# Supplementary material
Source: Springer Nature journal article supplement (https://www.springermedizin.de/resource/supplementary/13052_2010_118_MOESM4_ESM.pdf/9671430)
Supplement: MOESM4 [file 9671430]

**a****Arm**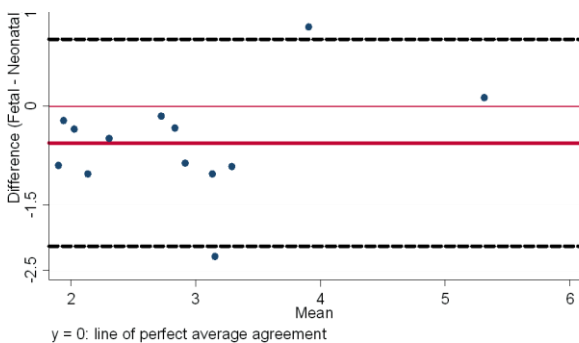

Correlation between difference and mean= -0,03

**b****Subscapular**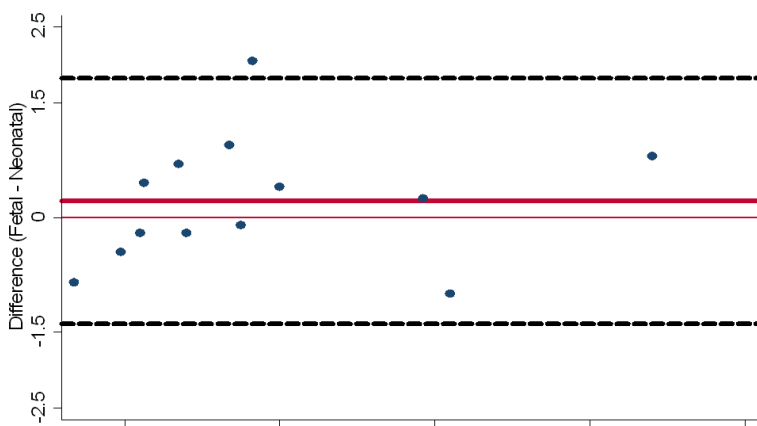

Correlation between difference and mean= 0,177

**c****Abdomen**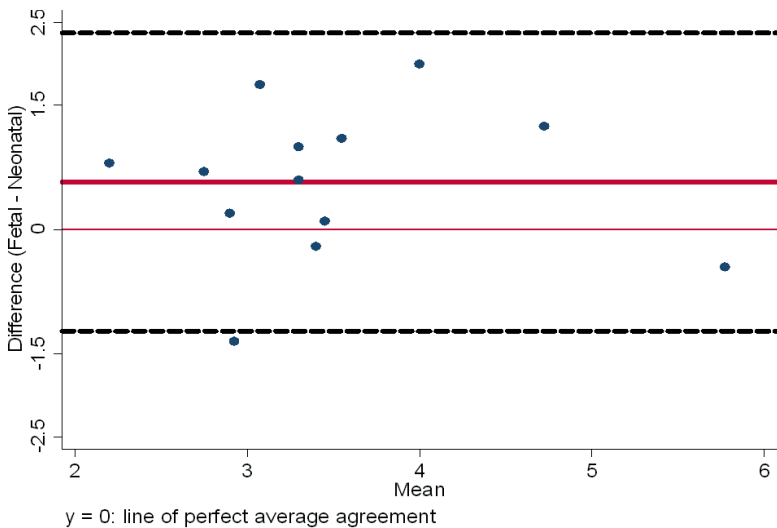

Correlation between difference and mean= -0,03
